1 **The Influence of NIHSS and Onset-to-Angiography Time on Neurological Outcomes**  
2 **Among Patients with Acute Ischemic Stroke Receiving Endovascular Thrombectomy-A**  
3 **Retrospective Observation Study**

4 Kuei-Ming Lin<sup>1</sup>; Shuang-Yu Lu<sup>1</sup>; Hong-Mo Shih<sup>1,2</sup>; Tai-Yi Hsu<sup>1,2</sup>; Fen-Wei Huang<sup>1</sup>;

5 Shih-Hao Wu<sup>1,3</sup>; Sheng-Ta Tsai<sup>4</sup>; Chien-Yu Liu<sup>1,3,5</sup>; Chin-Han Lin<sup>1,6</sup>

6 <sup>1</sup>Department of Emergency Medicine, China Medical University Hospital, China Medical  
7 University, Taichung, Taiwan.

8 <sup>2</sup> School of Medicine, China Medical University, Taichung, Taiwan.

9 <sup>3</sup> College of Medicine, China Medical University, Taichung, Taiwan.

10 <sup>4</sup> Department of Neurology, China Medical University Hospital, China Medical University,  
11 Taichung, Taiwan.

12 <sup>5</sup> Department of Bioinformatics and Medical Engineering, Asia University, Taichung, Taiwan.

13 <sup>6</sup> Ph.D. Program for Aging, College of Medicine, China Medical University, Taichung,  
14 Taiwan

15 \*Correspondence: Chin-Han Lin, email: kenny70520@gmail.com, address: No. 2, Xueshi  
16 Rd., North Dist., Taichung City 404327, Taiwan (R.O.C.)

17 Total words count of the manuscript: 4129

18

19 **Abstract**

20 **Background:** Acute ischemic stroke is a life-threatening condition requiring urgent  
21 intervention. For patients with large vessel occlusion (LVO), timely endovascular  
22 thrombectomy (EVT) is critical. This retrospective observational study investigates the  
23 impact of the National Institute of Health Stroke Scale (NIHSS) and onset-to-angiography  
24 time (OAT) on one-month neurological outcomes in acute ischemic stroke patients.

25 **Methods:** A total of 300 acute ischemic stroke patients with LVO who underwent EVT at a  
26 tertiary medical center in Taiwan from Jan. 2015 to Dec. 2018 were included. The  
27 NIHSS-time score was calculated by multiplying the pre-EVT NIHSS score by OAT.  
28 Favorable outcomes were defined as a modified Rankin Scale (mRS)  $\leq 2$  at one month.  
29 Multivariate logistic regression was used to identify the association between NIHSS-time  
30 scores and outcomes, adjusting for confounders.

31 **Results:** Patients with a NIHSS-time score  $< 4093$  had significantly higher odds of achieving  
32 favorable outcomes (adjusted OR = 2.94, 95% CI = 1.56–5.56,  $p < 0.001$ ). This highlights the  
33 importance of early EVT and initial stroke severity assessment in predicting recovery.

34 **Conclusion:** This study demonstrates that lower NIHSS-time scores are strongly associated  
35 with favorable neurological outcomes. Patients with a NIHSS-time score less than 4093 had a  
36 significantly higher ratio of favorable neurological function after one month. The  
37 NIHSS-time score offers a practical tool for prognostic evaluation, emphasizing the urgency

38 of EVT in acute ischemic stroke patients. However, further studies are needed to validate  
39 these findings and explore their generalizability.

40 **Keywords:** Large vessel occlusion (LVO), endovascular thrombectomy (EVT)

## 41 **Introduction**

42 Acute ischemic stroke is a life-threatening medical condition that demands prompt  
43 intervention in the ED to minimize brain damage and improve patient outcomes. Early  
44 reperfusion therapy, such as intravenous thrombolysis and endovascular thrombectomy, has  
45 been shown to significantly enhance recovery and reduce long-term disability in stroke  
46 patients [1-6]. In Taiwan, cerebrovascular disease ranks as the fourth leading cause of death  
47 across all age groups, with ischemic stroke accounting for approximately 70% of all stroke  
48 cases [7].

49 The management of AIS in Taiwan involves a well-coordinated system where emergency  
50 medical technicians (EMTs) transport patients to the nearest healthcare facility capable of  
51 administering appropriate treatments. Patients who are candidates for both intravenous  
52 thrombolysis and EVT are managed under a “drip and ship” strategy [8-9], where initial  
53 thrombolysis is administered at the nearest hospital before transferring the patient to  
54 EVT-capable facility. Conversely, patients eligible solely for EVT are directly transported to a  
55 specialized hospital equipped to perform endovascular thrombectomy [10].

56 Timely reperfusion is critical for both intravenous thrombolysis and endovascular

57 thrombectomy to ensure optimal neurological outcomes. However, the “drip and ship”  
58 strategy, while beneficial in certain contexts, can inadvertently increase the  
59 onset-to-angiography time (OAT) for patients with large vessel occlusion (LVO), potentially  
60 delaying crucial intervention [11].

61 The NIHSS is a widely used clinical tool to assess stroke severity and predict outcomes.  
62 Higher NIHSS scores correlate with more severe neurological deficits and poorer prognoses.  
63 The combination of NIHSS scores with OAT, referred to as the NIHSS-time score, provides a  
64 comprehensive measure that integrates both the severity of the stroke and the timeliness of  
65 intervention, which may be pivotal in predicting functional outcomes [12-13].

66 This current single-center retrospective cohort study aims to assess the influence of the  
67 NIHSS-time score on the neurological outcomes of patients with acute ischemic stroke  
68 undergoing endovascular thrombectomy. By analyzing data from a tertiary medical center in  
69 Taiwan, this study seeks to elucidate the prognostic significance of the NIHSS-time score and  
70 highlight the critical importance of minimizing OAT to enhance recovery in AIS patients.

## 71 **Methods**

### 72 **Study design and setting**

73 This retrospective observational study was conducted in the ED of China Medical University  
74 Hospital (CMUH), a prominent urban tertiary referral hospital located in Taichung City,  
75 Taiwan. The hospital is a major healthcare provider, featuring approximately 2,200 general

76 ward beds and 130 intensive care unit (ICU) beds. In 2018, the ED alone received over  
77 160,000 patient visits. China Medical University Hospital is equipped to provide  
78 comprehensive acute stroke care, including both intravenous thrombolysis and endovascular  
79 therapy.

80 Upon patient arrival at the ED, an acute stroke protocol is immediately activated during  
81 triage, ensuring rapid and systematic management of stroke cases. All patients receive  
82 standard care in accordance with the guidelines set forth by the American Heart Association,  
83 the American Stroke Association and the Taiwan Stroke Society [14-15]. Diagnostic imaging,  
84 including contrast-enhanced brain computed tomography with perfusion studies and  
85 three-dimensional vascular reconstructions, is performed concurrently. Two experienced  
86 neurologists independently review these images to confirm the diagnosis and evaluate the  
87 suitability and safety of EVT. Eligible patients received EVT within 80 minutes after arrival.  
88 To ensure accurate follow-up, the neurological disability status of patients was tracked by  
89 the case managers of the Stroke Center at China Medical University Hospital. These case  
90 managers conducted follow-up assessments, either in person or via telephone, to determine  
91 the mRS scores one month after discharge. This systematic follow-up allowed for consistent  
92 and reliable measurement of patient outcomes. The study was approved by the Institutional  
93 Review Board (IRB) of China Medical University Hospital (CMUH110-REC3-189).

#### 94 **Study population**

95 This study included all patients presenting with symptoms of acute ischemic stroke who were  
96 either directly admitted to the ED of China Medical University Hospital or referred from  
97 other hospitals between January 2015 and December 2018. China Medical University  
98 Hospital, located in Taichung City, Taiwan, serves as a major tertiary referral center,  
99 providing specialized care including intravenous thrombolysis and endovascular  
100 thrombectomy for stroke patients.

101 The initial analysis encompassed a comprehensive review of patient data sourced from the  
102 hospital's electronic medical record system. The inclusion criteria were broad, capturing all  
103 individuals exhibiting stroke symptoms to ensure a representative sample of the acute  
104 ischemic stroke population. The patient selection process is shown in Figure 1. The exclusion  
105 criteria for this study were explicitly defined to maintain a clear focus on the acute ischemic  
106 stroke population receiving EVT. Patients with hemorrhagic stroke and refusal of EVT  
107 treatment were excluded if they met any of the following conditions:

### 108 **Variables and data collection**

109 Relevant variables and data collection recorded retrospectively included demographic data  
110 such as age and gender. Comprehensive medical histories were recorded, including comorbid  
111 conditions such as hypertension, diabetes mellitus, atrial fibrillation, and previous stroke  
112 events. Initial and discharge NIHSS scores were also collected, with the NIHSS being  
113 utilized at both admission and discharge to assess the severity of neurological impairment.

114 Onset-to-angiography time was a crucial variable in this study. OAT was defined as the  
115 interval, measured in minutes, from the time the patient was last known to be well to the time  
116 of reperfusion during EVT, and meticulously documented. The NIHSS-time score was  
117 calculated to integrate both the severity of the stroke and the timeliness of treatment. This  
118 score was computed by multiplying the NIHSS score obtained prior to EVT by the OAT.  
119 Todo et al. [13] employed the NIHSS-time score in their retrospective single-center analysis,  
120 demonstrating its utility in predicting outcomes after endovascular therapy in acute ischemic  
121 stroke patients

122 Finally, the Modified Rankin Scale (mRS) was used to evaluate the functional outcomes of  
123 patients one-month post-discharge. This scale, ranging from 0 (no symptoms) to 6 (death),  
124 provided a standardized measure of neurological disability and recovery.

### 125 **Outcome measurement**

126 The primary outcome of this study was the functional outcome of patients at one-month  
127 post-discharge. To assess neurological function, we employed the modified Rankin Scale  
128 (mRS), a widely recognized and validated tool for measuring the degree of disability or  
129 dependence in daily activities of stroke survivors. The mRS scores range from 0 to 6, with  
130 each level representing a different severity of disability. For the purposes of this study,  
131 functional outcomes were dichotomized into favorable (mRS: 0-2) and unfavorable (mRS:  
132 3-6) categories.

133 **Statistical analysis**

134 To analyze the correlation between various clinical variables and neurological functional  
135 outcomes, the study population was divided into two groups based on their neurological  
136 disability status at one-month post-discharge, as measured by the modified Rankin Scale  
137 (mRS). Patients were categorized into those with favorable outcomes (mRS 0-2) and those  
138 with unfavorable outcomes (mRS 3-6).

139 Differences between two groups were analyzed through chi-square test for categorical  
140 variables and independent-sample *t* testing for continuous variables. Univariate and  
141 multivariate analysis were used to identify the variables correlation with neurological  
142 functional outcome.

143 Logistic regression was used to model the probability of achieving a favorable outcome  
144 (mRS 0-2) based on the independent variables. Odds ratios (ORs) with 95% confidence  
145 intervals (CIs) were calculated to quantify the strength of associations. Variables with  
146 p-values less than 0.05 were considered statistically significant.

147 To assess the predictive accuracy of the NIHSS-time score on neurological outcomes, a  
148 receiver operating characteristic (ROC) curve was constructed. The area under the curve  
149 (AUC) was calculated to quantify the overall ability of the NIHSS-time score to discriminate  
150 between patients with favorable and unfavorable outcomes. Youden's J statistic was used to  
151 select the optimum cut off for continuous variables.



152 All statistical assessments were two-tailed testing. Statistical significance was defined as  
153  $p < .05$ . All statistical analyses were processed with SAS (version 9.4; SAS Institute, Cary,  
154 NC).

## 155 **Results**

### 156 **Patient population**

157 A total of 4,986 patients presenting with acute cerebrovascular accidents (CVA) were  
158 transported or referred to China Medical University Hospital between January 2015 and  
159 December 2018. Of these, 1,162 patients were diagnosed with intracranial hemorrhage and  
160 were excluded from further analysis. The remaining 3,824 patients were diagnosed with  
161 ischemic stroke. Among these ischemic stroke patients, 300 underwent endovascular  
162 thrombectomy (EVT) (Figure 1).

### 163 **Neurological outcomes**

164 Out of the 300 patients who received EVT, 65 patients achieved favorable neurological  
165 outcomes (mRS 0-2), while 235 patients had unfavorable outcomes (mRS 3-6). The group  
166 with favorable outcomes had a mean age of  $63.52 \pm 11.91$  years, which was significantly  
167 younger than the unfavorable outcome group, with a mean age of  $69.65 \pm 11.79$  years ( $p <$   
168  $0.001$ ). The favorable outcome group also had a lower prevalence of diabetes mellitus  
169 (35.38% vs. 50.64%,  $p = 0.029$ ) and higher hyperlipidemia (32.31% vs. 14.89%,  $p = 0.001$ ),  
170 as well as lower initial NIHSS scores ( $15.45 \pm 5.49$  vs.  $20.35 \pm 6.85$ ,  $p < 0.001$ ) and

171 NIHSS-OAT scores ( $4847.0 \pm 3484.1$  vs.  $7397.6 \pm 6302.9$ ,  $p < 0.001$ ). Additionally, a higher  
172 proportion of males was observed in the favorable outcome group (72.31% vs. 54.04%,  $p =$   
173 0.008) (Table 1).

#### 174 **Multivariate Analysis**

175 In the multivariate logistic regression analysis, several factors remained significantly  
176 correlated with favorable one-month neurological outcomes. These factors included younger  
177 age (OR 0.96, 95% CI 0.94-0.99,  $p = 0.004$ ), absence of diabetes mellitus (OR 0.51, 95% CI  
178 0.28-0.94,  $p = 0.030$ ), presence of hyperlipidemia (OR 2.58, 95% CI 1.30-5.13,  $p = 0.006$ ),  
179 lower pre-EVT NIHSS scores (OR 0.88, 95% CI 0.84-0.93,  $p < 0.001$ ), and lower pre-EVT  
180 NIHSS-OAT scores (OR 0.99, 95% CI 0.98-0.99,  $p < 0.001$ ). Gender and the use of  
181 intravenous thrombolysis (tPA) were not significantly associated with neurological outcomes  
182 in the multivariate analysis (Table 2).

#### 183 **ROC curve analysis**

184 The receiver operating characteristic (ROC) curve analysis of the pre-EVT NIHSS-OAT  
185 score on neurological outcomes revealed an area under the curve (AUC) of 0.6519, indicating  
186 moderate predictive accuracy (Figure 2). The optimal cutoff value for the pre-EVT  
187 NIHSS-OAT score was determined to be 4093, based on Youden's J statistic. Patients with a  
188 pre-EVT NIHSS-OAT score less than 4093, regardless of their primary hospital source, had  
189 significantly better one-month neurological outcomes compared to those with higher scores

190 (Table 3).

## 191 **Discussion**

192 Our results have revealed that a lower NIHSS–time score is associated with better one-month  
193 neurological outcomes among acute ischemic stroke patients with large vessel occlusion.

194 These findings align with those reported by Kenichi Todo et al., who similarly found that

195 timely intervention significantly impacts stroke recovery [13]. Additionally, Karolina Skagen

196 et al. illustrated that early recanalization serves as an independent predictor of good clinical

197 outcomes in patients with severe ischemic stroke, particularly those with an initial NIHSS

198 score greater than 15 [16]. This reinforces the critical importance of swift medical response.

199 Man-Seok Park et al. reported that the "drip and ship" paradigm, which can increase the onset

200 to groin puncture time, is associated with unfavorable functional outcomes [17]. Higher

201 baseline NIHSS and delayed reperfusion were key predictors of hemorrhagic transformation,

202 highlighting the need for rapid EVT in eligible patients [18]. By combining the NIHSS score

203 with OAT, the NIHSS–time score provides a comprehensive measure that reflects both the

204 initial neurological status and the efficiency of treatment delivery. Combining these findings,

205 directly transporting acute stroke patients with suspected LVO to EVT-capable hospitals is

206 crucial for improving neurological outcomes by reducing onset-to-angiography time, as

207 highlighted by Kass-Hout et al [19]. Our results demonstrate that even patients with high

208 NIHSS scores have the potential to achieve favorable outcomes if OAT is minimized through

209 effective pre-hospital triage and transportation.

210 In our study, older age, female gender, and the presence of diabetes mellitus were  
211 correlated with poorer neurological outcomes. This is consistent with findings by Raluca  
212 Tudor et al., who identified older age and diabetes mellitus as risk factors for poor  
213 neurological outcomes, although their study found that males had worse outcomes [16]. The  
214 relationship between gender and stroke outcomes is complex. Women frequently present with  
215 atypical stroke symptoms, such as altered consciousness, fatigue, and general weakness,  
216 which can lead to misdiagnosis and delayed treatment. In Taiwan, studies have indicated that  
217 women are more likely to experience delayed hospital visits and receive less aggressive  
218 stroke interventions compared to men, contributing to poorer functional outcomes. This  
219 discrepancy highlights the need for further research to explore gender differences in stroke  
220 outcomes.

221 Despite the strengths of our study, several limitations should be considered. Firstly, this  
222 study's retrospective design may cause reporting bias, particularly in the accurate  
223 documentation of OAT. Larger, multicenter cohorts are needed to confirm our results and  
224 enhance external validity. Secondly, our patients were transported by ambulances from  
225 various cities, including Taichung, Nantou, Changhua, and Yunlin, each with different  
226 dispatch policies. This variability may have influenced the OAT due to heterogeneous  
227 transportation times. Thirdly, retrospective designs make it difficult to control for

228 confounding variables, potentially affecting causal inferences. Fourth, the study excluded  
229 patients with hemorrhagic stroke and those who refused EVT treatment. This may introduce  
230 selection bias, limiting the study's ability to represent the full spectrum of acute ischemic  
231 stroke patients. Lastly, although the NIHSS-time score showed predictive value in a  
232 Taiwanese healthcare setting, its applicability in other regions may be limited by differences  
233 in healthcare infrastructure, EVT access, and prehospital transportation times. Future studies  
234 in diverse settings are needed to validate these findings.

235 **Conclusion:**

236 Patients with a NIHSS-time score less than 4093 demonstrated a favorable one-month  
237 neurological functional prognosis. Early endovascular thrombectomy in stroke patients with  
238 large vessel occlusion is critical for improving neurological outcomes. Our findings  
239 underscore the importance of efficient pre-hospital triage and direct transportation to  
240 EVT-capable hospitals to minimize treatment delays and enhance recovery prospects.

241 **Acknowledgments:** We would like to express our gratitude to the staffs of the Department of  
242 Emergency Medicine, and Department of Neurology and Department of Medical Imaging at  
243 China Medical University Hospital, China Medical University (Taichung, Taiwan) for their  
244 dedicated efforts in caring for the patients with ischemic stroke.

245 **Author contributions**

246 Conceptualization, KML, SYL, HMS, TYH, CYL and CHL. Methodology, KML, SYL,

247 HMS, TYH, CYL and CHL. Ethics Approval and Consent, CHL. Data collection: KML,  
248 SYL, TYH, SHW, STT, CYL and CHL. Data analysis and interpretation: HMS, TYH and  
249 FWH. Visualization, HMS, TYH, FWH. Funding acquisition, HMS and CHL. Project  
250 administration, KML, SYL, HMS, TYH, CYL and CHL. Supervision, CYL and CHL.  
251 Writing-original draft, KML and SYL. Writing-review and editing, all authors critically  
252 revised and approved the final version of the manuscript.

253 **Sources of Funding:** The study is supported by the following grants: DMR-110-173 from  
254 China Medical University Hospital, Taichung, Taiwan.

255 **Disclosures:** The authors declare no competing interests.

256 **Reference(s):**

- 257 1. Powers WJ, Derdeyn CP, Biller J, Coffey CS, Hoh BL, Jauch EC, Johnston KC, Johnston SC,  
258 Khalessi AA, Kidwell CS, et al. 2015 American Heart Association/American Stroke Association  
259 Focused Update of the 2013 Guidelines for the Early Management of Patients With Acute  
260 Ischemic Stroke Regarding Endovascular Treatment: A Guideline for Healthcare Professionals  
261 From the American Heart Association/American Stroke Association. *Stroke*. 2015;46:3020-3035.  
262 doi: 10.1161/STR.0000000000000074
- 263 2. Berkhemer OA, Fransen PS, Beumer D, van den Berg LA, Lingsma HF, Yoo AJ, Schonewille  
264 WJ, Vos JA, Nederkoorn PJ, Wermer MJ, et al. A randomized trial of intraarterial treatment for  
265 acute ischemic stroke. *N Engl J Med*. 2015;372:11-20. doi: 10.1056/NEJMoa1411587

- 266 3. Campbell BC, Mitchell PJ, Kleinig TJ, Dewey HM, Churilov L, Yassi N, Yan B, Dowling RJ,  
267 Parsons MW, Oxley TJ, et al. Endovascular therapy for ischemic stroke with perfusion-imaging  
268 selection. *N Engl J Med*. 2015;372:1009-1018. doi: 10.1056/NEJMoa1414792
- 269 4. Goyal M, Demchuk AM, Menon BK, Eesa M, Rempel JL, Thornton J, Roy D, Jovin TG,  
270 Willinsky RA, Sapkota BL, et al. Randomized assessment of rapid endovascular treatment of  
271 ischemic stroke. *N Engl J Med*. 2015;372:1019-1030. doi: 10.1056/NEJMoa1414905
- 272 5. Saver JL, Goyal M, Bonafe A, Diener HC, Levy EI, Pereira VM, Albers GW, Cognard C, Cohen  
273 DJ, Hacke W, et al. Stent-retriever thrombectomy after intravenous t-PA vs. t-PA alone in stroke.  
274 *N Engl J Med*. 2015;372:2285-2295. doi: 10.1056/NEJMoa1415061
- 275 6. Jovin TG, Chamorro A, Cobo E, de Miquel MA, Molina CA, Rovira A, San Roman L, Serena J,  
276 Abilleira S, Ribo M, et al. Thrombectomy within 8 hours after symptom onset in ischemic stroke.  
277 *N Engl J Med*. 2015;372:2296-2306. doi: 10.1056/NEJMoa1503780
- 278 7. Ministry of Health and Welfare, Taiwan. (2020). Statistics of Causes of Death.  
279 <https://www.mohw.gov.tw/cp-5256-63399-2.html>
- 280 8. Deguchi I, Mizuno S, Kohyama S, Tanahashi N, Takao M. Drip-and-Ship Thrombolytic Therapy  
281 for Acute Ischemic Stroke. *J Stroke Cerebrovasc Dis*. 2018;27:61-67. doi:  
282 10.1016/j.jstrokecerebrovasdis.2017.07.033
- 283 9. Broderick JP, Palesch YY, Demchuk AM, Yeatts SD, Khatri P, Hill MD, Jauch EC, Jovin TG,  
284 Yan B, Silver FL, et al. Endovascular therapy after intravenous t-PA versus t-PA alone for stroke.

- 285 *N Engl J Med.* 2013;368:893-903. doi: 10.1056/NEJMoa1214300
- 286 10. Saver JL, Fonarow GC, Smith EE, Reeves MJ, Grau-Sepulveda MV, Pan W, Olson DM,  
287 Hernandez AF, Peterson ED, Schwamm LH. Time to treatment with intravenous tissue  
288 plasminogen activator and outcome from acute ischemic stroke. *JAMA.* 2013;309:2480-2488. doi:  
289 10.1001/jama.2013.6959
- 290 11. Meretoja A, Strbian D, Mustanoja S, Tatlisumak T, Lindsberg PJ, Kaste M. Reducing in-hospital  
291 delay to 20 minutes in stroke thrombolysis. *Neurology.* 2012;79:306-313. doi:  
292 10.1212/WNL.0b013e31825d6011
- 293 12. Jr HPA, P H Davis ECL, Chang KC, Bendixen BH, Clarke WR, Woolson RF, Hansen MD.  
294 Baseline NIH Stroke Scale score strongly predicts outcome after stroke A report of the Trial of  
295 Org 10172 in Acute Stroke Treatment (TOAST). *Neurology.* 1999;53:126-131. doi:  
296 10.1212/wnl.53.1.126
- 297 13. Todo K, Sakai N, Kono T, Hoshi T, Imamura H, Adachi H, Kohara N. National Institutes of  
298 Health Stroke Scale-Time Score Predicts Outcome after Endovascular Therapy in Acute  
299 Ischemic Stroke: A Retrospective Single-Center Study. *J Stroke Cerebrovasc Dis.*  
300 2016;25:1187-1191. doi: 10.1016/j.jstrokecerebrovasdis.2016.01.027
- 301 14. Powers WJ, Derdeyn CP, Biller J, Coffey CS, Hoh BL, Jauch EC, Johnston KC, Johnston SC,  
302 Khalessi AA, Kidwell CS, et al. 2015 American Heart Association/American Stroke Association  
303 Focused Update of the 2013 Guidelines for the Early Management of Patients With Acute



- 304 Ischemic Stroke Regarding Endovascular Treatment: A Guideline for Healthcare Professionals  
305 From the American Heart Association/American Stroke Association. *Stroke*. 2015;46:3020-3035.  
306 doi: 10.1161/STR.0000000000000074
- 307 15. Taiwan Stroke Society. (2013, September). Guidelines of Ischemic Stroke.  
308 <https://www.stroke.org.tw/GoWeb2/include/getfile.php?file=f01&KeyID=203696717566>  
309 44140fbfb02
- 310 16. Skagen K, Skjelland M, Russell D, Jacobsen EA. Large-Vessel Occlusion Stroke: Effect of  
311 Recanalization on Outcome Depends on the National Institutes of Health Stroke Scale Score. *J*  
312 *Stroke Cerebrovasc Dis*. 2015;24:1532-1539. doi: 10.1016/j.jstrokecerebrovasdis.2015.03.020
- 313 17. Park MS, Lee JS, Park TH, Cho YJ, Hong KS, Park JM, Kang K, Lee KB, Kim JG, Lee SJ, et al.  
314 Characteristics of the Drip-and-Ship Paradigm for Patients with Acute Ischemic Stroke in South  
315 Korea. *J Stroke Cerebrovasc Dis*. 2016;25:2678-2687. doi:  
316 10.1016/j.jstrokecerebrovasdis.2016.07.015
- 317 18. Iancu A, Buleu F, Chita DS, Tutelca A, Tudor R, Brad S. Early Hemorrhagic Transformation  
318 after Reperfusion Therapy in Patients with Acute Ischemic Stroke: Analysis of Risk Factors and  
319 Predictors. *Brain Sci*. 2023;13. doi: 10.3390/brainsci13050840
- 320 19. Kass-Hout T, Lee J, Tataris K, Richards CT, Markul E, Weber J, Mendelson S, O'Neill K,  
321 Sednew RM, Prabhakaran S. Prehospital Comprehensive Stroke Center vs Primary Stroke Center  
322 Triage in Patients With Suspected Large Vessel Occlusion Stroke. *JAMA Neurol*.

323 2021;78:1220-1227. doi: 10.1001/jamaneurol.2021.2485

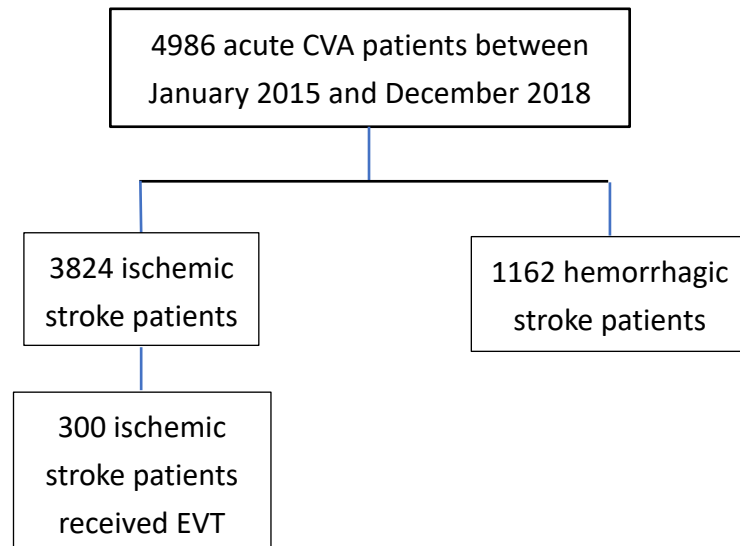

Figure 1. Patient enrollment. CVA = cerebrovascular accident, EVT = endovascular thrombectomy.

Table 1. Demographic data of different neurological functional outcomes.

| Variable                                     | 1-month mRS |             | p-value |
|----------------------------------------------|-------------|-------------|---------|
|                                              | 0-2 (n=65)  | 3-6 (n=235) |         |
| Age, (mean ± SD)                             | 63.52±11.91 | 69.65±11.79 | <0.001  |
| Gender                                       |             |             | 0.008   |
| Male, n (%)                                  | 47(72.31)   | 127(54.04)  |         |
| Female, n (%)                                | 18(27.69)   | 108(45.96)  |         |
| Old CVA, n (%)                               | 13(20.00)   | 40(17.02)   | 0.577   |
| Hypertension, n (%)                          | 47(72.31)   | 183(77.87)  | 0.347   |
| Diabetes mellitus, n (%)                     | 23(35.38)   | 119(50.64)  | 0.029   |
| Hyperlipidemia, n (%)                        | 21(32.31)   | 35(14.89)   | 0.001   |
| Arrhythmia, n (%)                            | 32(49.23)   | 119(50.64)  | 0.840   |
| Coronary artery disease, n (%)               | 7(10.77)    | 33(14.04)   | 0.492   |
| Congestive heart failure, n (%)              | 5(7.69)     | 31(13.19)   | 0.227   |
| Valvular heart disease, n (%)                | 3(4.62)     | 7(2.98)     | 0.456   |
| Peripheral arterial occlusive disease, n (%) | 1(1.54)     | 1(0.43)     | 0.387   |
| Chronic kidney disease, n (%)                | 1(1.54)     | 2(0.85)     | 0.520   |
| Cancer, n (%)                                | 2(3.08)     | 22(9.36)    | 0.098   |
| tPA, n (%)                                   | 23(35.38)   | 74(31.49)   | 0.552   |

---

|                  |  |  |       |
|------------------|--|--|-------|
| Primary hospital |  |  | 0.345 |
|------------------|--|--|-------|

---

|             |           |            |  |
|-------------|-----------|------------|--|
| CMUH, n (%) | 35(53.85) | 111(47.23) |  |
|-------------|-----------|------------|--|

---

|              |           |            |  |
|--------------|-----------|------------|--|
| Other, n (%) | 30(46.15) | 124(52.77) |  |
|--------------|-----------|------------|--|

---

|                         |             |             |       |
|-------------------------|-------------|-------------|-------|
| OAT (minute), (mean±SD) | 319.0±204.6 | 376.5±331.0 | 0.088 |
|-------------------------|-------------|-------------|-------|

---

|                          |            |            |        |
|--------------------------|------------|------------|--------|
| Pre-EVT NIHSS, (mean±SD) | 15.45±5.49 | 20.35±6.85 | <0.001 |
|--------------------------|------------|------------|--------|

---

|                                       |               |               |        |
|---------------------------------------|---------------|---------------|--------|
| Pre-EVT NIHSSxOAT (minute), (mean±SD) | 4847.0±3484.1 | 7397.6±6302.9 | <0.001 |
|---------------------------------------|---------------|---------------|--------|

---

|                   |  |  |        |
|-------------------|--|--|--------|
| Pre-EVT NIHSSxOAT |  |  | <0.001 |
|-------------------|--|--|--------|

---

|               |           |           |  |
|---------------|-----------|-----------|--|
| < 4093, n (%) | 36(55.38) | 72(30.64) |  |
|---------------|-----------|-----------|--|

---

|              |           |            |  |
|--------------|-----------|------------|--|
| ≥4093, n (%) | 29(44.62) | 163(69.36) |  |
|--------------|-----------|------------|--|

---

CVA: cerebral vascular accident; SD: standard deviation; tPA: tissue plasminogen activator

---

CMUH: China Medical University Hospital; NIHSS: National Institutes of Health Stroke Scale

---

Table 2: Univariate and multivariate logistic regression analysis of factors for favorable neurological functional outcomes.

| Variable                 | 1-month mRS       |             | p-value          | 1-month mRS  |         |
|--------------------------|-------------------|-------------|------------------|--------------|---------|
|                          | Univariate        | OR (95% CI) |                  | Multivariate | p-value |
|                          | OR (95% CI)       |             |                  | OR (95% CI)  |         |
| Age                      | 0.96 (0.94-0.98)  | <0.001      | 0.96 (0.94-0.99) | 0.004        |         |
| Gender                   |                   |             |                  |              |         |
| Male                     | Ref.              | -           | Ref.             | -            |         |
| Female                   | 2.22 (1.22-4.05)  | 0.009       | 1.85 (0.97-3.54) | 0.062        |         |
| Old CVA                  | 1.22 (0.61-2.45)  | 0.577       |                  |              |         |
| Hypertension             | 0.74 (0.40-1.39)  | 0.348       |                  |              |         |
| Diabetes mellitus        | 0.53 (0.30-0.94)  | 0.030       | 0.51 (0.28-0.94) | 0.030        |         |
| Hyperlipidemia           | 2.73 (1.45-5.13)  | 0.001       | 2.58 (1.30-5.13) | 0.006        |         |
| Arrythmia                | 0.95 (0.55-1.64)  | 0.840       |                  |              |         |
| Coronary artery disease  | 0.74 (0.31-1.76)  | 0.493       |                  |              |         |
| Congestive heart failure | 0.55 (0.20-1.47)  | 0.233       |                  |              |         |
| Valvular heart disease   | 1.58 (0.40-6.28)  | 0.518       |                  |              |         |
| PAOD                     | 3.66 (0.23-59.26) | 0.361       |                  |              |         |
| Chronic kidney disease   | 1.82 (0.16-20.41) | 0.626       |                  |              |         |

|                   |                  |        |                  |       |
|-------------------|------------------|--------|------------------|-------|
| Cancer            | 0.31 (0.07-1.34) | 0.117  |                  |       |
| tPA               | 1.19 (0.67-2.12) | 0.552  | 1.15 (0.59-2.24) | 0.683 |
| Hospital          |                  |        |                  |       |
| CMUH              | 1.30 (0.75-2.26) | 0.345  |                  |       |
| Other             | Ref.             | -      |                  |       |
| OAT (minute)      | 0.99 (0.99-1.00) | 0.185  |                  |       |
| Pre-EVT NIHSS     | 0.88 (0.84-0.93) | <0.001 |                  |       |
| Pre-EVT NIHSSxOAT | 0.99 (0.98-0.99) | 0.001  |                  |       |

Table 3: Analysis of pre-EVT NIHSS-OAT score categories and hospital sources in relation to one-month neurological outcomes.

| Variable                                  | 1-month mRS      |             | p-value | 1-month mRS      |         |
|-------------------------------------------|------------------|-------------|---------|------------------|---------|
|                                           | Univariate       | OR (95% CI) |         | Multivariate     | p-value |
|                                           |                  |             |         | OR (95% CI)      |         |
| Pre-EVT NIHSSxOAT                         |                  |             |         |                  |         |
| <4093                                     | Ref.             |             | -       |                  |         |
| ≥4093                                     | 0.36             |             | <0.001  |                  |         |
| Pre-EVT NIHSSxOAT<br>and hospital sources |                  |             |         |                  |         |
| <4093&CMUH                                | Ref.             |             | -       | Ref.             | -       |
| ≥4093&CMUH                                | 0.35 (0.16-0.78) |             | 0.011   | 0.28 (0.11-0.68) | 0.005   |
| <4093&other                               | 1.00 (0.43-2.34) |             | 1.000   | 0.70 (0.28-1.78) | 0.457   |
| ≥4093&other                               | 0.36 (0.18-0.73) |             | 0.004   | 0.32 (0.15-0.68) | 0.003   |



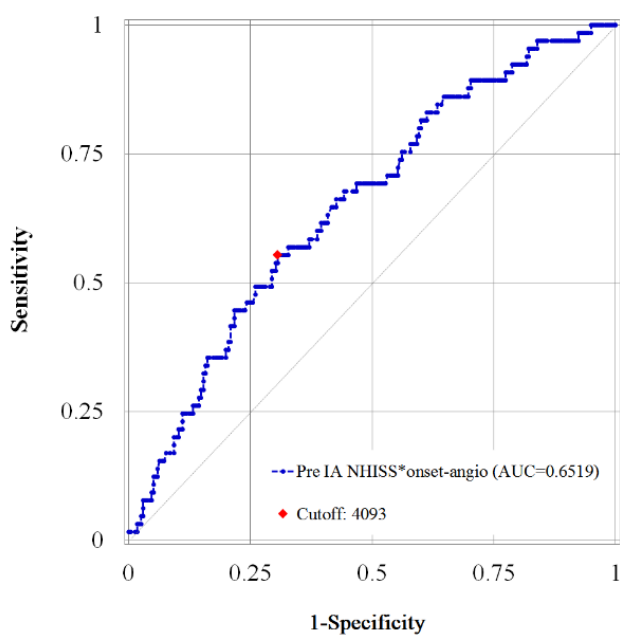

Figure 2. Receiver operating characteristic curve. The receiver operating characteristic (ROC) curve for pre-EVT NIHSS-time score and favorable neurological outcome. The Area under the curve is 0.6519. The best cut off pre-EVT NIHSS-time score value was 4093.
